# Supplementary material for: Effect of NiAl alloy microparticles deposited in flexible SERS substrates on the limit of detection of rhodamine B molecules
Source: Royal Society of Chemistry journal article supplement (doi:10.1039/d4nr02592j), 2024-01-01
Supplement: d4nr02592j1.pdf [file d4nr02592j1.pdf]

## SUPPLEMENTARY INFORMATION

### Effect of NiAl alloy microparticles deposited in Flexible SERS Substrates on the limit of detection of Rhodamine B molecules

A. Molina, J. Oliva, M. Vazquez-Lepe, M. Lopez-Medina, L. Ojeda D. Rios, H.  
Flores-Zuñiga

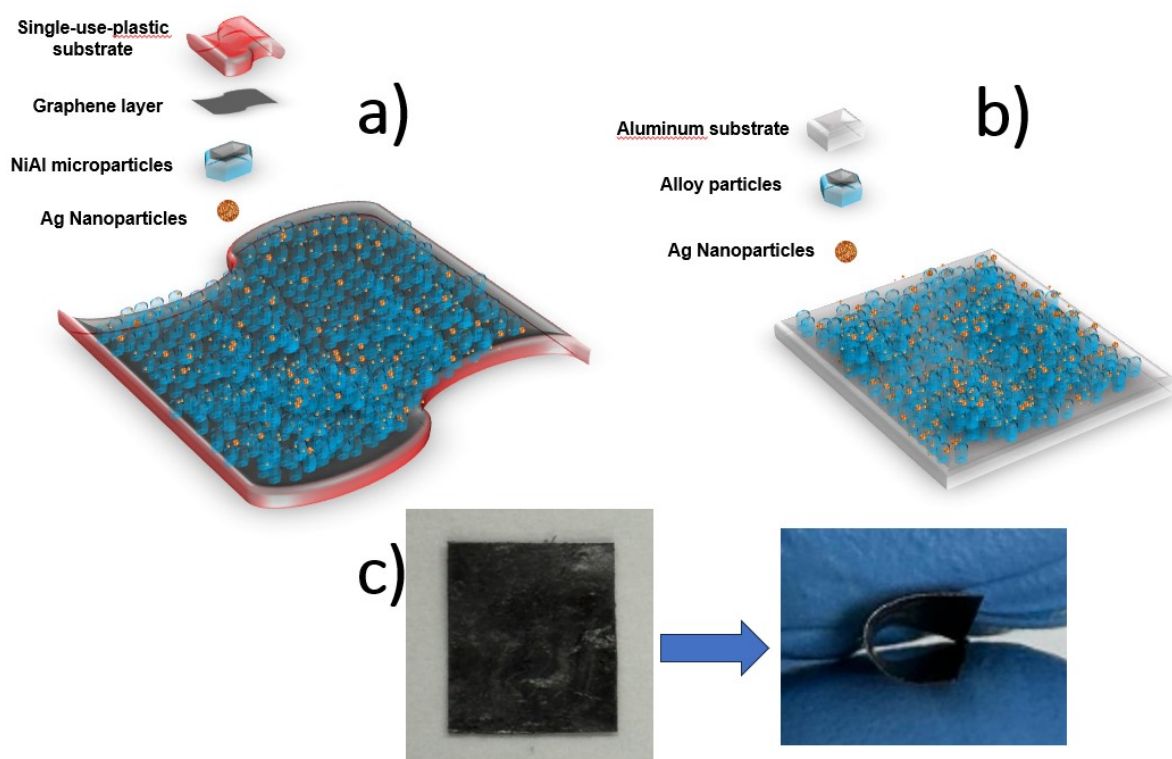

**FIGURE S1.** Schematic illustration showing the FERS substrate made with: a) graphene and b) Al layer (coating on the single use packets already deposited by the manufacturer). c) digital photographs of the FERS substrates fabricated in this work.

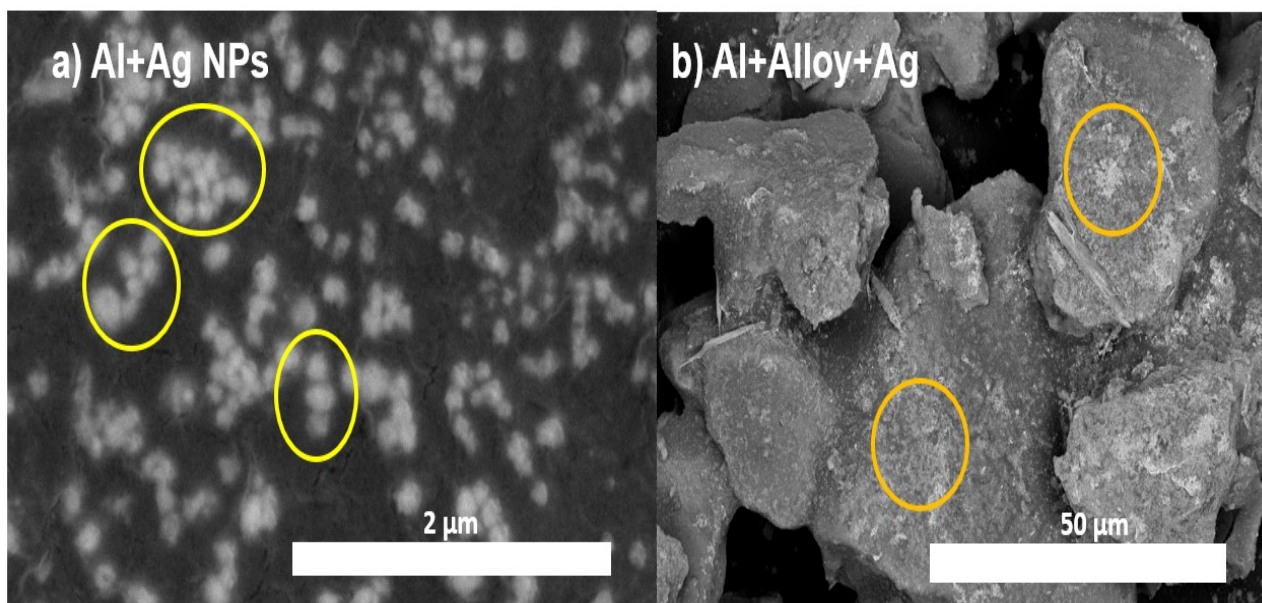

**FIGURE S2.** SEM images for: FSERS substrates made of: a) Al+Ag-NPs and b) Al+NiAl-alloy+Ag-NPs.

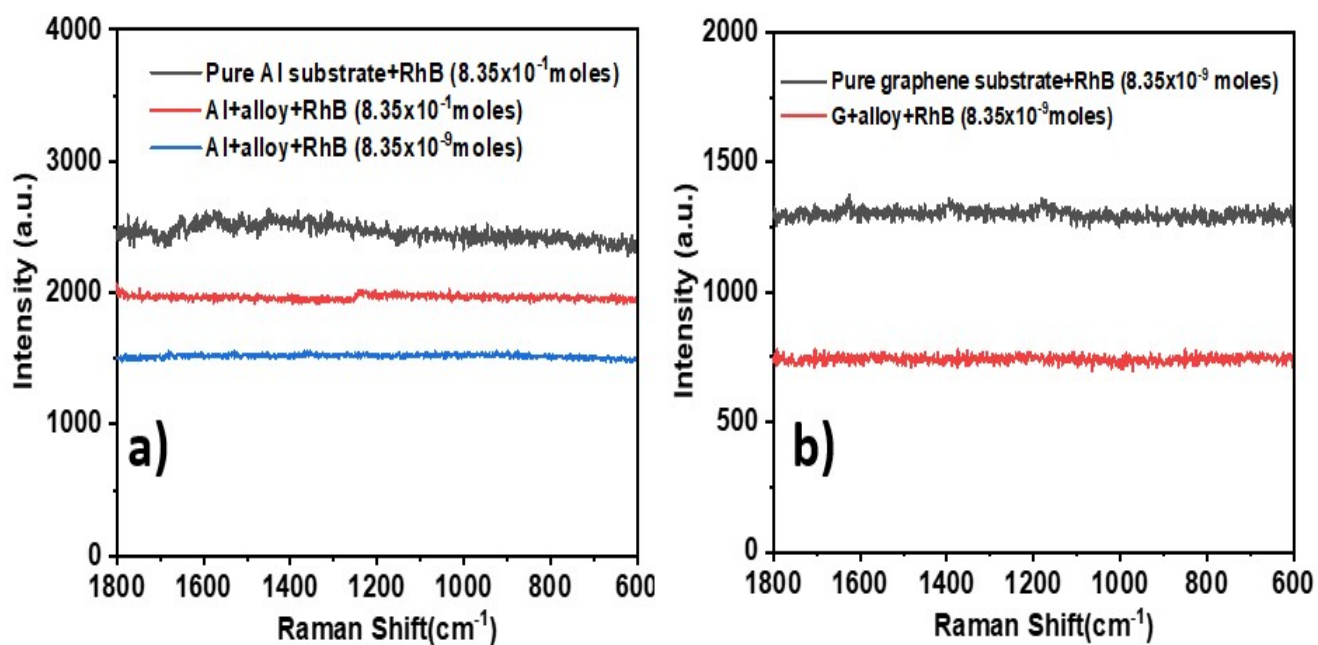

**FIGURE S3.** Raman signals for different FSERS substrates made with different concentration of RhB and NiAl alloy (without Ag NPs).

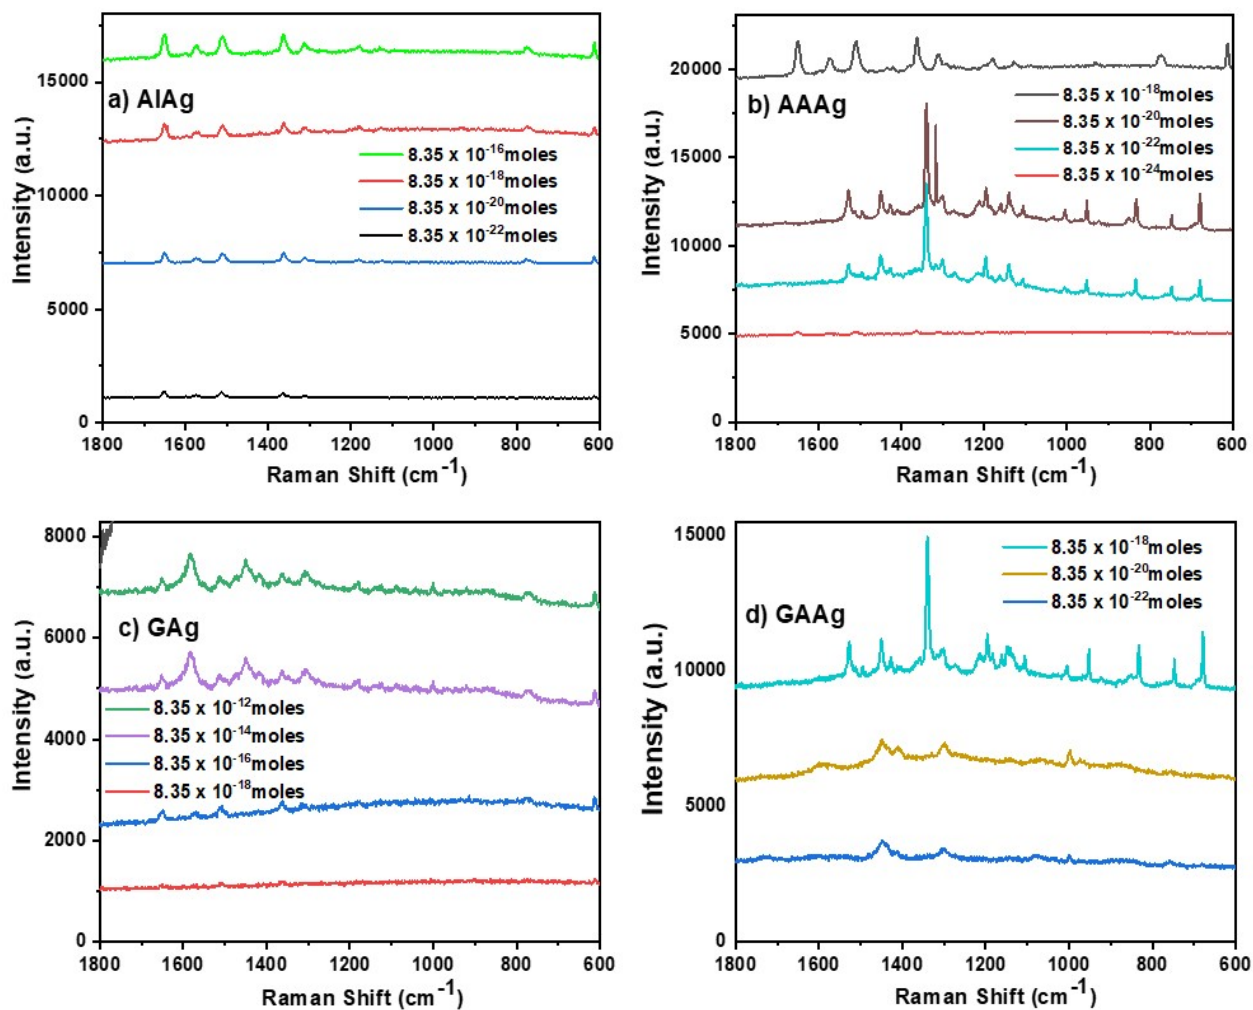

**FIGURE S4.** Zoomed view of the Raman signals depicted in Figures 5a-5d.

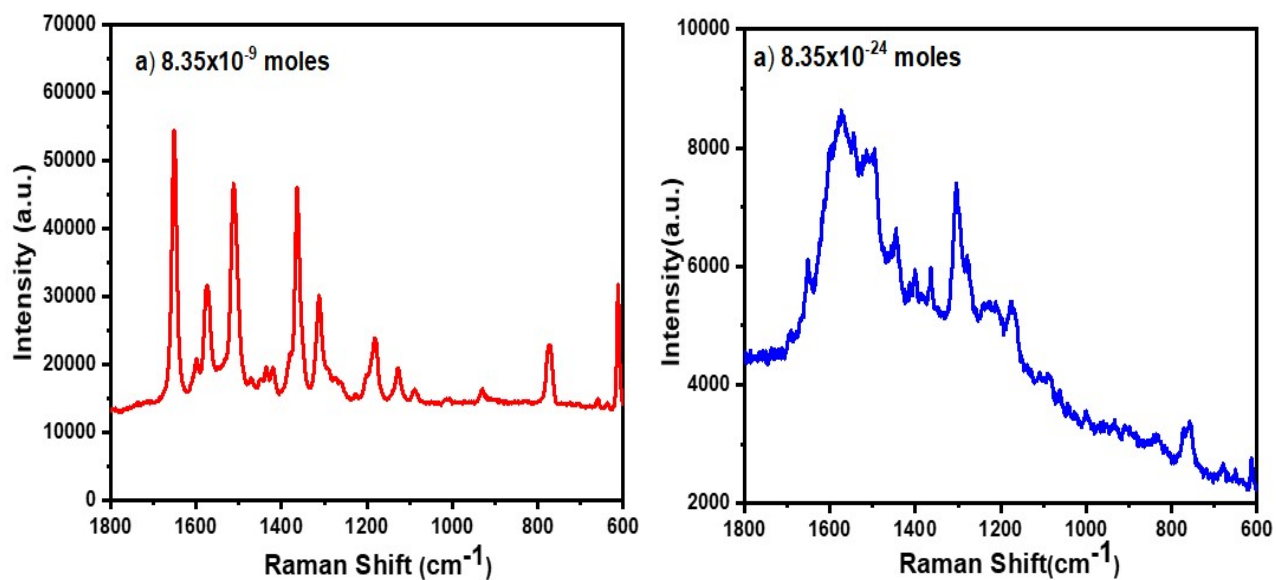

**FIGURE S5.** a) and b) show the Raman spectra for two SERS substrates (Al+NiAl+Ag-NPs) that were stored for 10 months, but they had on their surface fresh (recent) concentrations of RhB ( $8.35 \times 10^{-9}$  and  $8.35 \times 10^{-24}$  moles).

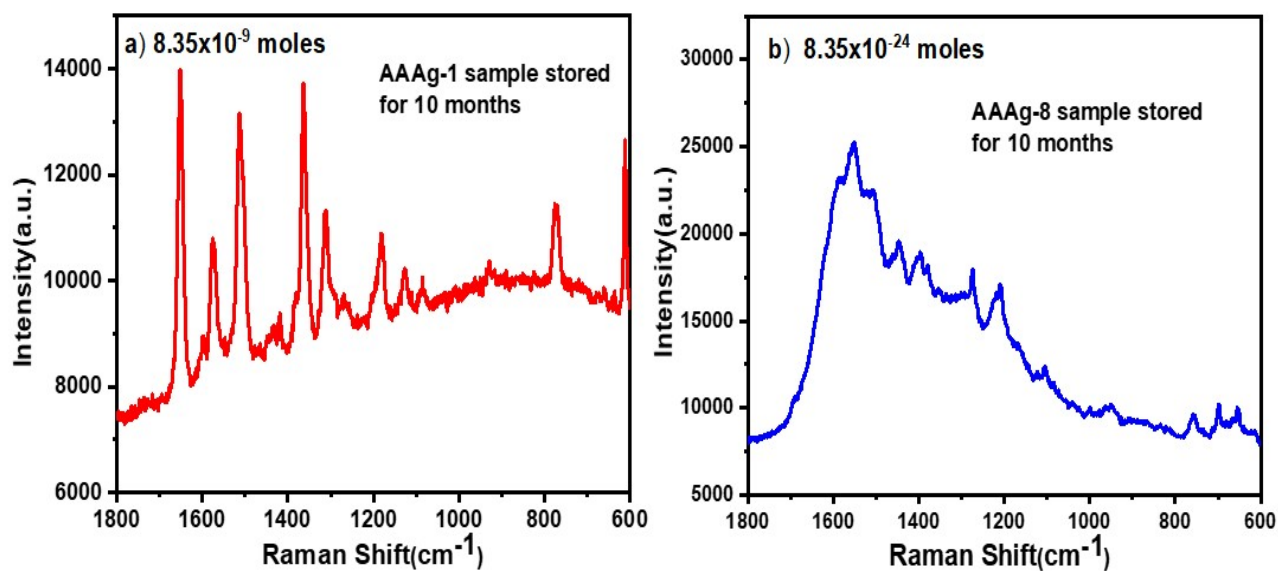

**FIGURE S6.** Raman spectra for old AAAG-1 and AAAG-8 SERS substrates stored for 10 months. Those substrates had RhB molecules on their surface.

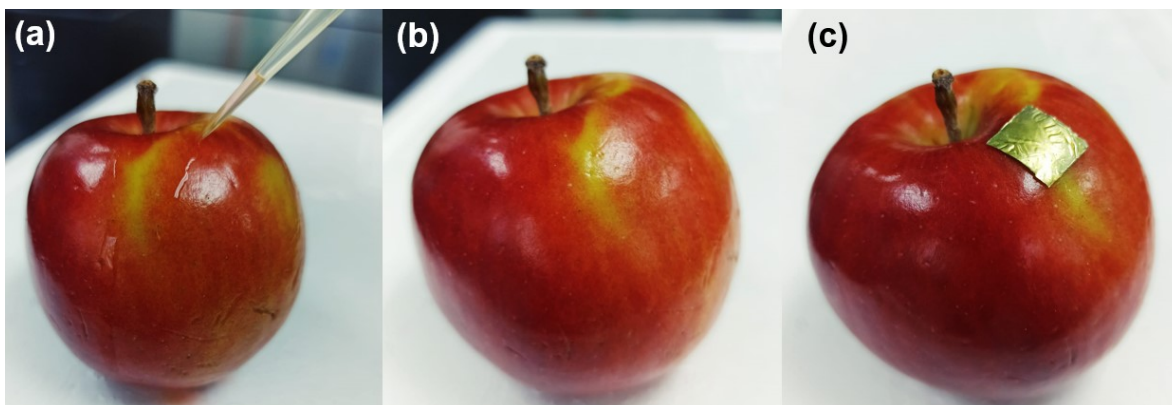

**FIGURE S7.** a) and b) show the deposition of RhB on the red apple. c) shows the SERS substrate (Al+NiAl+Ag-NPs) on the apple to take the sample of RhB.

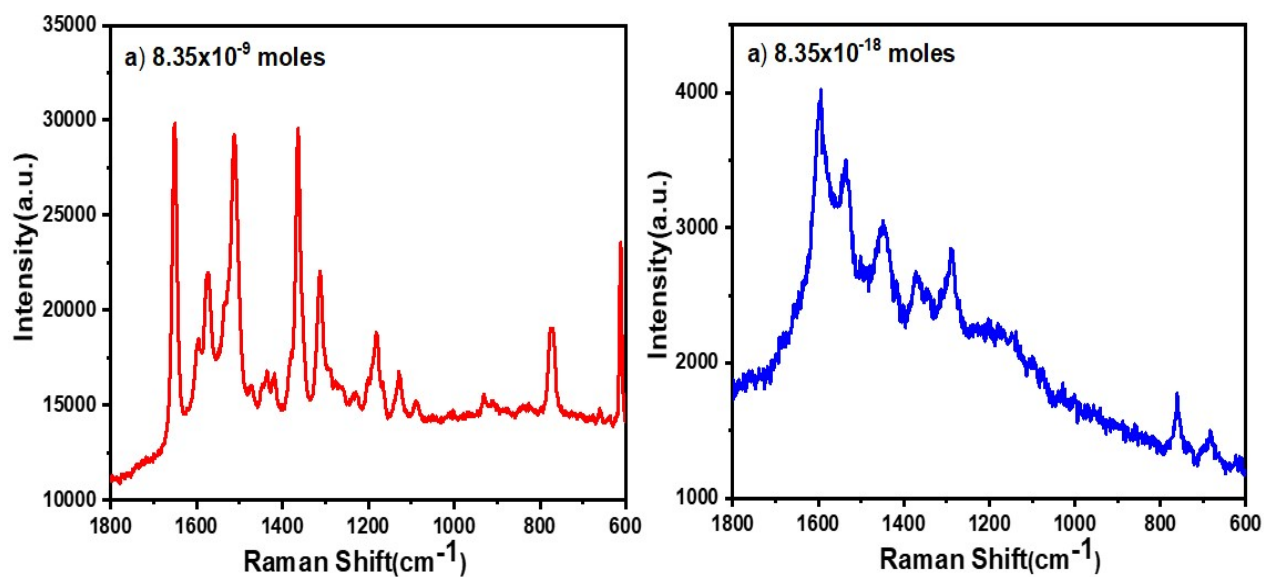

**FIGURE S8.** Raman spectra obtained from SERS substrates (Al+NiAl+Ag-NPs), which were used to take samples of RhB molecules from red apples.

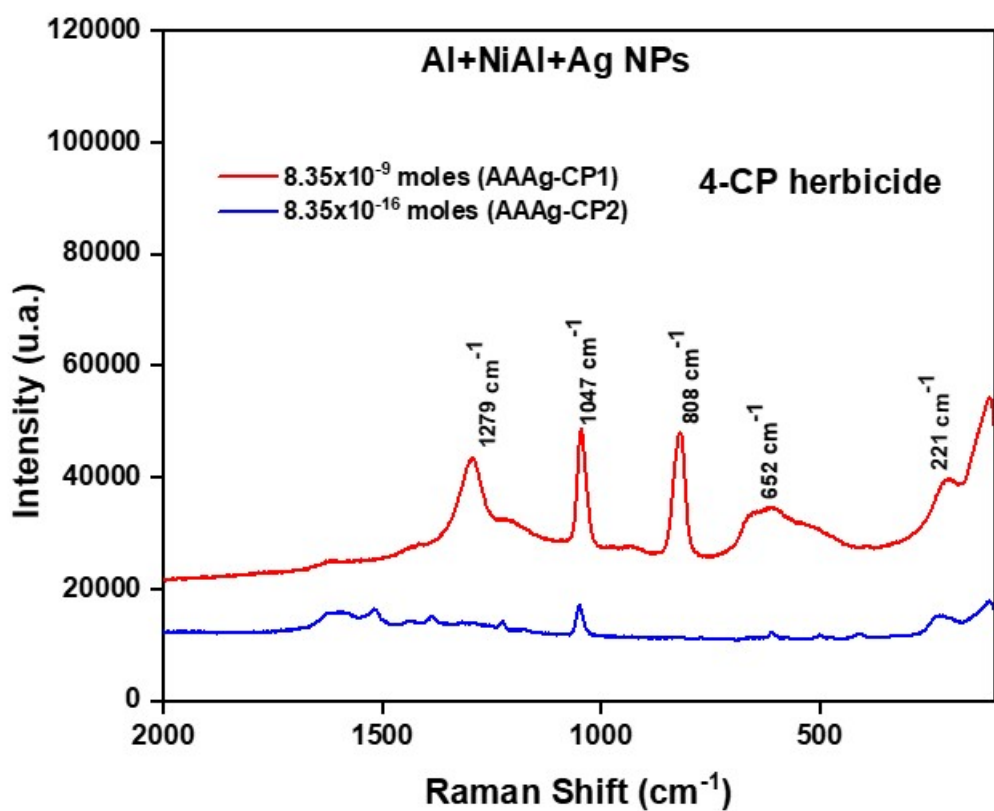

**FIGURE S9.** Raman spectra for two SERS substrates (made with Al+alloy+Ag-NPs), which had on their surface RhB with concentrations of  $8.35 \times 10^{-9}$  and  $8.35 \times 10^{-16}$  moles.

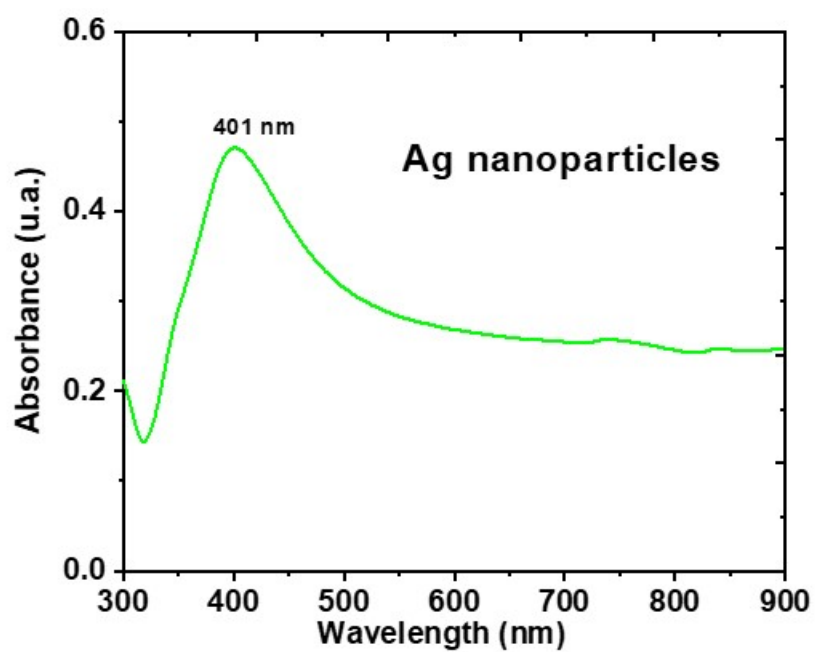

**FIGURE S10.** Plasmonic (absorption) spectra for the Ag NPs utilized in this research.

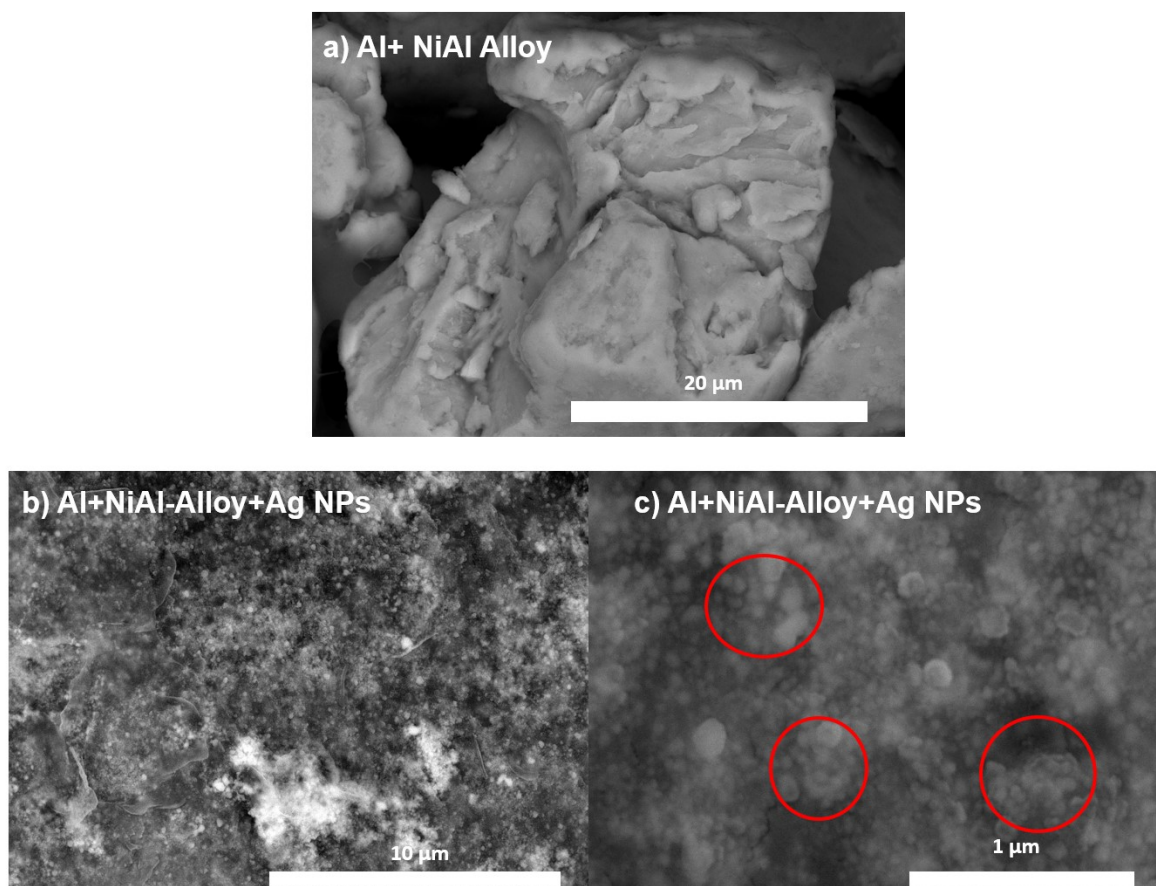

**FIGURE S11.** SEM images for: a) Bare NiAl alloy microparticle, b) NiAl alloy microparticle decorated with Ag NPs and c) Zoomed view for the NiAl alloy microparticle decorated with Ag NPs.

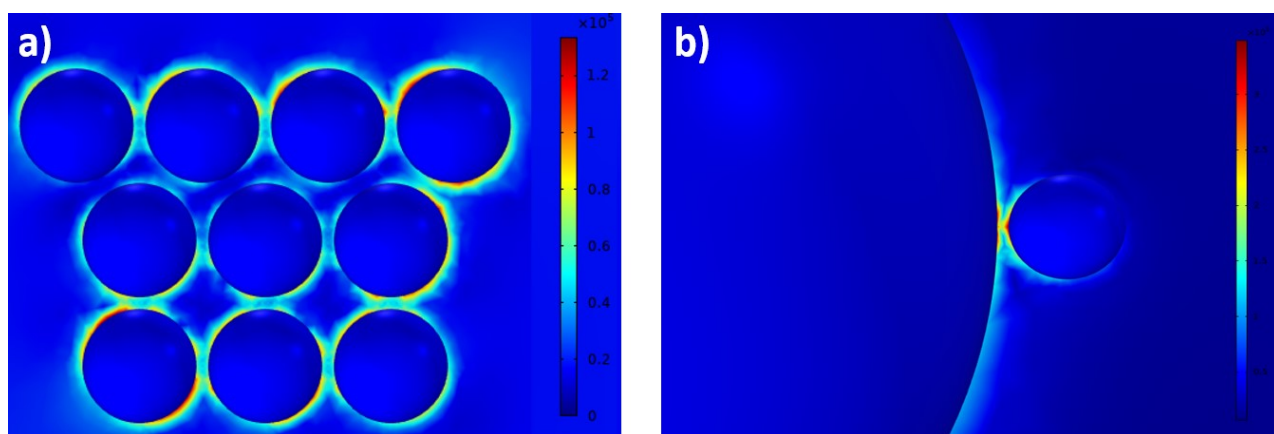

**FIGURE S12.** Calculation of electric field for the following systems: a) agglomerate of 10 Ag NPs and b) one Ag NP and the bulk NiAl alloy. The separation distance among particles was 2 nm.

**TABLE S1. Parameters for the detection of RhB using the FSERS substrates made of Al+Ag-NPs**

| Sample | Number of Moles on substrate | Number of Molecules on substrate | Sample Area ( $\mu\text{m}^2$ ) | Molecules/substrate area ( $\mu\text{m}^2$ ) | EF                                                                                            | Standard Deviation |
|--------|------------------------------|----------------------------------|---------------------------------|----------------------------------------------|-----------------------------------------------------------------------------------------------|--------------------|
| AlAg-1 | $8.35 \times 10^{-9}$        | $5.0296 \times 10^{15}$          | $1 \times 10^8$                 | $5.0296 \times 10^7$                         | 33495                                                                                         | $\pm 5\%$          |
| AlAg-2 | $8.35 \times 10^{-12}$       | $5.0296 \times 10^{12}$          | $1 \times 10^8$                 | $5.0296 \times 10^4$                         | $3.898 \times 10^7$                                                                           | $\pm 5\%$          |
| AlAg-3 | $8.35 \times 10^{-14}$       | $5.0296 \times 10^{10}$          | $1 \times 10^8$                 | $5.0296 \times 10^4$                         | $2.13 \times 10^9$                                                                            | $\pm 5\%$          |
| AlAg-4 | $8.35 \times 10^{-16}$       | $5.0296 \times 10^8$             | $1 \times 10^8$                 | $5.02 \times 10^0$                           | $1.20 \times 10^{10}$                                                                         | $\pm 5\%$          |
| AlAg-5 | $8.35 \times 10^{-18}$       | $5.0296 \times 10^6$             | $1 \times 10^8$                 | $5.0296 \times 10^{-2}$                      | $7.08 \times 10^{11}$                                                                         | $\pm 5\%$          |
| AlAg-6 | $8.35 \times 10^{-20}$       | $5.0296 \times 10^4$             | $1 \times 10^8$                 | $5.0296 \times 10^{-4}$                      | $6.21 \times 10^{13}$                                                                         | $\pm 5\%$          |
| AlAg-7 | $8.35 \times 10^{-22}$       | $5.0296 \times 10^2$             | $1 \times 10^8$                 | $5.0296 \times 10^{-6}$                      | $3.11 \times 10^{15}$<br>(reference= Al+NiAl)<br>$1.07 \times 10^{11}$<br>(reference= AlAg-1) | $\pm 5\%$          |

**TABLE S2. Parameters for the detection of RhB using the FSERS substrates made of Al+NiAl+Ag-NPs**

| Sample | Number of Moles on substrate | Number of Molecules on substrate | Sample Area ( $\mu\text{m}^2$ ) | Molecules/substrate area ( $\mu\text{m}^2$ ) | EF                                                                                           | Standard Deviation |
|--------|------------------------------|----------------------------------|---------------------------------|----------------------------------------------|----------------------------------------------------------------------------------------------|--------------------|
| AAAg-1 | $8.35 \times 10^{-9}$        | $5.0296 \times 10^{15}$          | $1 \times 10^8$                 | $5.0296 \times 10^7$                         | 59772                                                                                        | $\pm 5\%$          |
| AAAg-2 | $8.35 \times 10^{-12}$       | $5.0296 \times 10^{12}$          | $1 \times 10^8$                 | $5.0296 \times 10^4$                         | $1.74 \times 10^7$                                                                           | $\pm 5\%$          |
| AAAg-3 | $8.35 \times 10^{-14}$       | $5.0296 \times 10^{10}$          | $1 \times 10^8$                 | $5.0296 \times 10^4$                         | $3.32 \times 10^8$                                                                           | $\pm 5\%$          |
| AAAg-4 | $8.35 \times 10^{-16}$       | $5.0296 \times 10^8$             | $1 \times 10^8$                 | $5.02 \times 10^0$                           | $4.29 \times 10^{10}$                                                                        | $\pm 5\%$          |
| AAAg-5 | $8.35 \times 10^{-18}$       | $5.0296 \times 10^6$             | $1 \times 10^8$                 | $5.0296 \times 10^{-2}$                      | $1.94 \times 10^{12}$                                                                        | $\pm 5\%$          |
| AAAg-6 | $8.35 \times 10^{-20}$       | $5.0296 \times 10^4$             | $1 \times 10^8$                 | $5.0296 \times 10^{-4}$                      | $6.22 \times 10^{14}$                                                                        | $\pm 5\%$          |
| AAAg-7 | $8.35 \times 10^{-22}$       | $5.0296 \times 10^2$             | $1 \times 10^8$                 | $5.0296 \times 10^{-6}$                      | $5.203 \times 10^{16}$                                                                       | $\pm 5\%$          |
| AAAg-8 | $8.35 \times 10^{-24}$       | $5.0296 \times 10^0$             | $1 \times 10^8$                 | $5.0296 \times 10^{-8}$                      | $2.05 \times 10^{17}$<br>(reference= Al+NiAl)<br>$3.42 \times 10^{12}$<br>(reference= AAG-1) | $\pm 5\%$          |

**TABLE S3. Parameters for the detection of RhB using the FSERS substrates made of G+Ag-NPs**

| Sample | Number of Moles on substrate | Number of Molecules on substrate | Sample Area ( $\mu\text{m}^2$ ) | Molecules/substrate area ( $\mu\text{m}^2$ ) | EF                       | Error     |
|--------|------------------------------|----------------------------------|---------------------------------|----------------------------------------------|--------------------------|-----------|
| GAg-1  | $8.35 \times 10^{-9}$        | $5.0296 \times 10^{15}$          | $1 \times 10^8$                 | $5.0296 \times 10^7$                         | 12891                    | $\pm 5\%$ |
| GAg-2  | $8.35 \times 10^{-12}$       | $5.0296 \times 10^{12}$          | $1 \times 10^8$                 | $5.0296 \times 10^4$                         | $7.7 \times 10^6$        | $\pm 5\%$ |
| GAg-3  | $8.35 \times 10^{-14}$       | $5.0296 \times 10^{10}$          | $1 \times 10^8$                 | $5.0296 \times 10^4$                         | $6.86 \times 10^7$       | $\pm 5\%$ |
| GAg-4  | $8.35 \times 10^{-16}$       | $5.0296 \times 10^8$             | $1 \times 10^8$                 | $5.02 \times 10^0$                           | $2.7 \times 10^9$        | $\pm 5\%$ |
| GAg-5  | $8.35 \times 10^{-18}$       | $5.0296 \times 10^6$             | $1 \times 10^8$                 | $5.0296 \times 10^{-2}$                      | No Raman signal observed | $\pm 5\%$ |

**TABLE S4. Parameters for the detection of RhB using the FSERS substrates made of G+NiAl+Ag-NPs**

| Sample | Number of Moles on substrate | Number of Molecules on substrate | Sample Area ( $\mu\text{m}^2$ ) | Molecules/substrate area ( $\mu\text{m}^2$ ) | EF                    | Error     |
|--------|------------------------------|----------------------------------|---------------------------------|----------------------------------------------|-----------------------|-----------|
| GAAg-1 | $8.35 \times 10^{-9}$        | $5.0296 \times 10^{15}$          | $1 \times 10^8$                 | $5.0296 \times 10^7$                         | 37137                 | $\pm 5\%$ |
| GAAg-2 | $8.35 \times 10^{-12}$       | $5.0296 \times 10^{12}$          | $1 \times 10^8$                 | $5.0296 \times 10^4$                         | $1.6 \times 10^7$     | $\pm 5\%$ |
| GAAg-3 | $8.35 \times 10^{-14}$       | $5.0296 \times 10^{10}$          | $1 \times 10^8$                 | $5.0296 \times 10^4$                         | $1.1 \times 10^9$     | $\pm 5\%$ |
| GAAg-4 | $8.35 \times 10^{-16}$       | $5.0296 \times 10^8$             | $1 \times 10^8$                 | $5.02 \times 10^0$                           | $1.1 \times 10^{11}$  | $\pm 5\%$ |
| GAAg-5 | $8.35 \times 10^{-18}$       | $5.0296 \times 10^6$             | $1 \times 10^8$                 | $5.0296 \times 10^{-2}$                      | $5.02 \times 10^{12}$ | $\pm 5\%$ |
| GAAg-6 | $8.35 \times 10^{-20}$       | $5.0296 \times 10^4$             | $1 \times 10^8$                 | $5.0296 \times 10^{-4}$                      | $4.83 \times 10^{13}$ | $\pm 5\%$ |
| GAAg-7 | $8.35 \times 10^{-22}$       | $5.0296 \times 10^2$             | $1 \times 10^8$                 | $5.0296 \times 10^{-6}$                      | $6.89 \times 10^{15}$ | $\pm 5\%$ |
